# Supplementary material for: Interleukin-6 Contributes to the Development of Anemia in Juvenile CKD
Source: PubMed Central journal article supplement — Kidney Int Rep. 2018 Dec 19;4(3):470–83. doi: 10.1016/j.ekir.2018.12.006 (PMC6409399; doi:10.1016/j.ekir.2018.12.006), 2018-12-19
Supplement: mmc6.pdf [file mmc6.pdf]

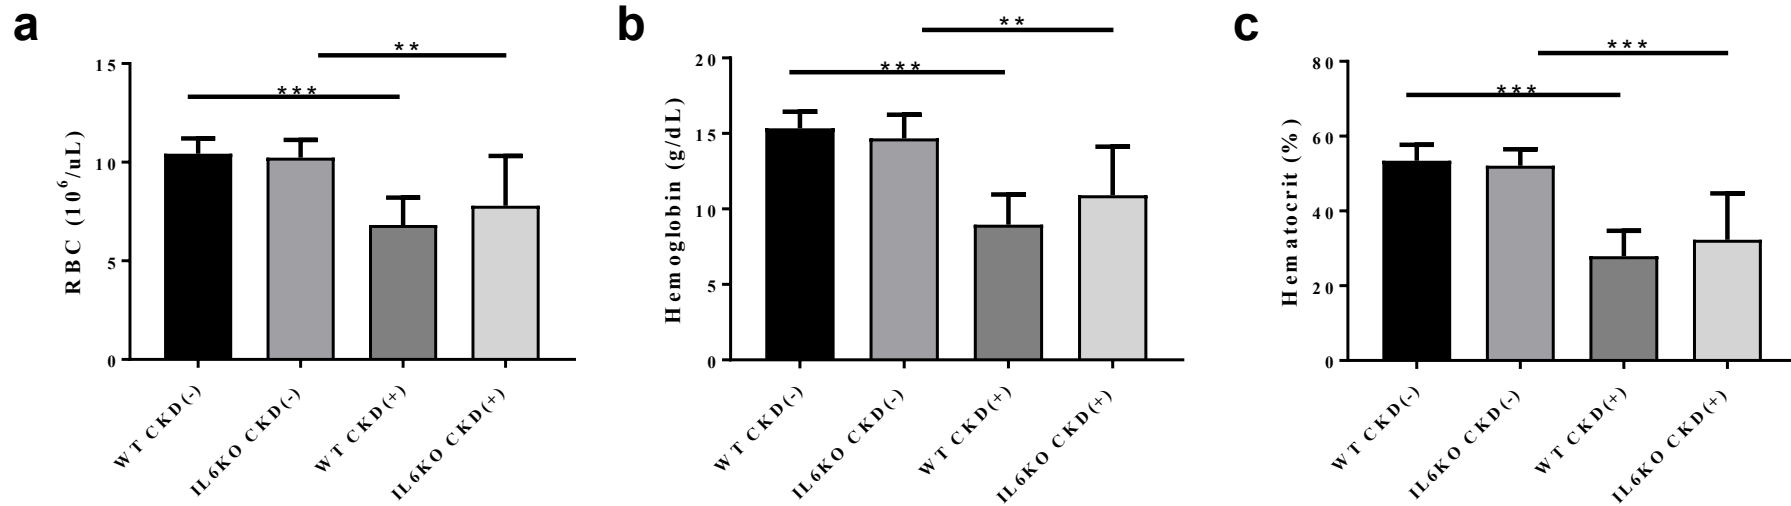

**Figure S3. Peripheral blood erythroid parameters in four groups of mice after 6 weeks of adenine diet**
