# Supplementary figures and images for: Interleukin-6 Contributes to the Development of Anemia in Juvenile CKD
Source: PubMed Central journal article supplement — Kidney Int Rep. 2018 Dec 19;4(3):470–83. doi: 10.1016/j.ekir.2018.12.006 (PMC6409399; doi:10.1016/j.ekir.2018.12.006), 2018-12-19

WT CKD (+)

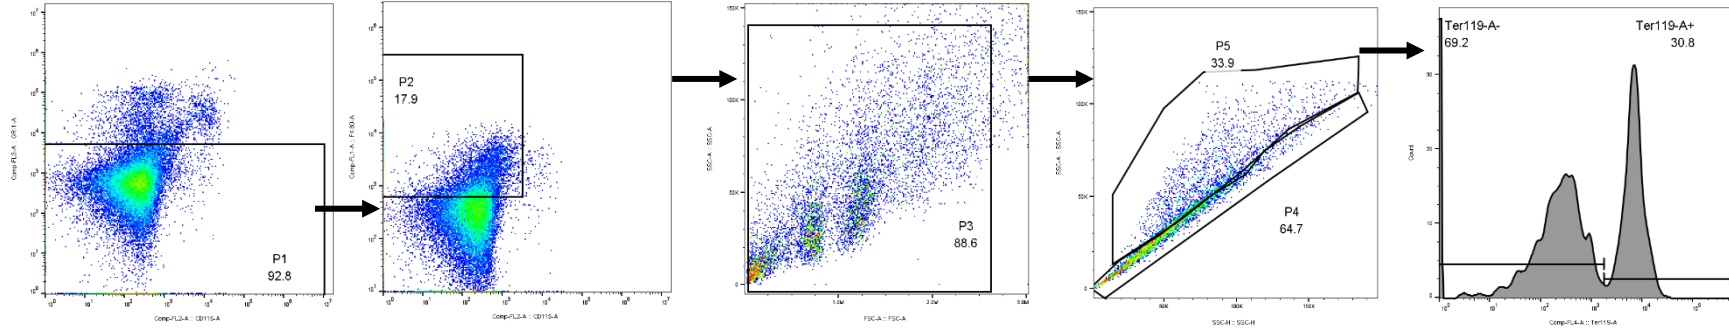

*IL-6* KO CKD (+)

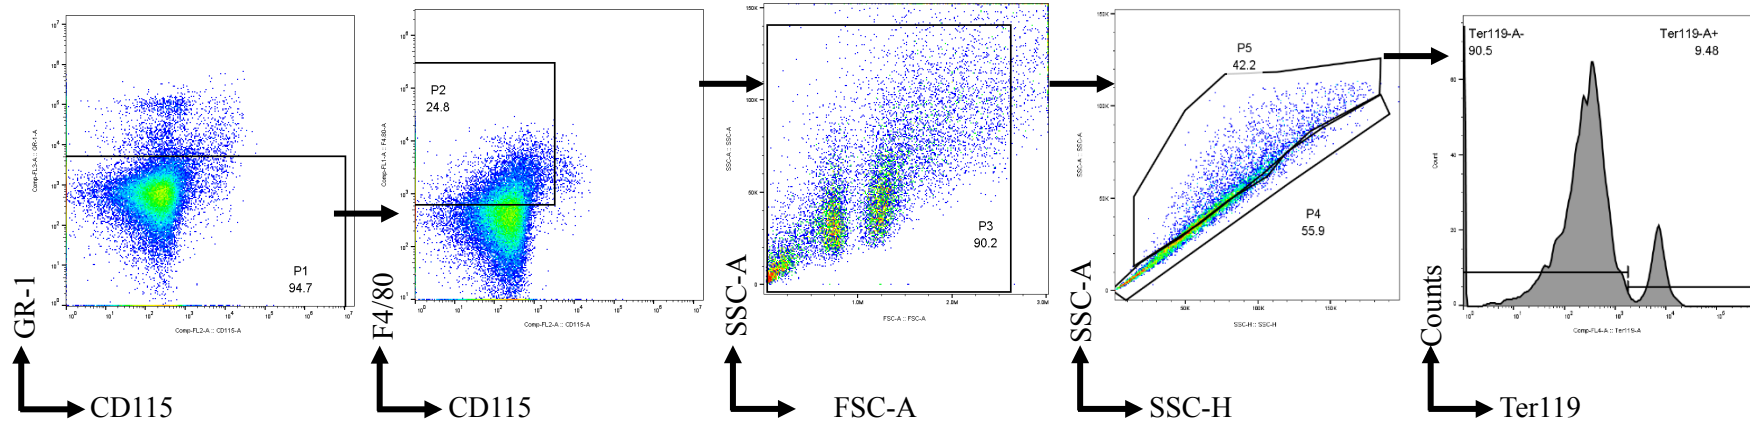

Supplement: mmc4.pdf [file mmc4.pdf]

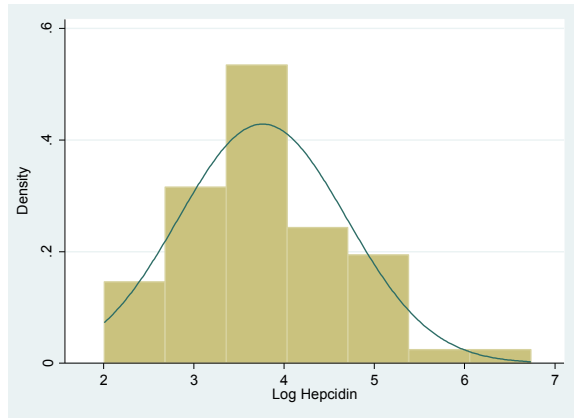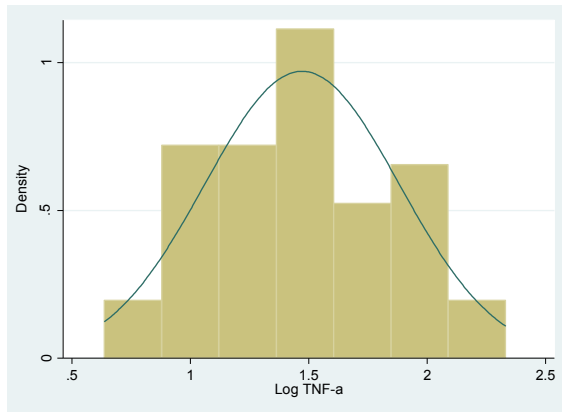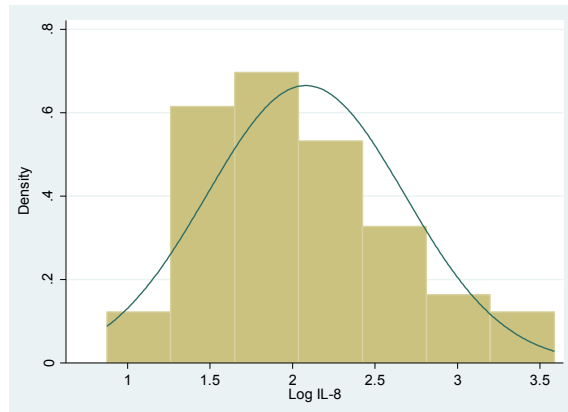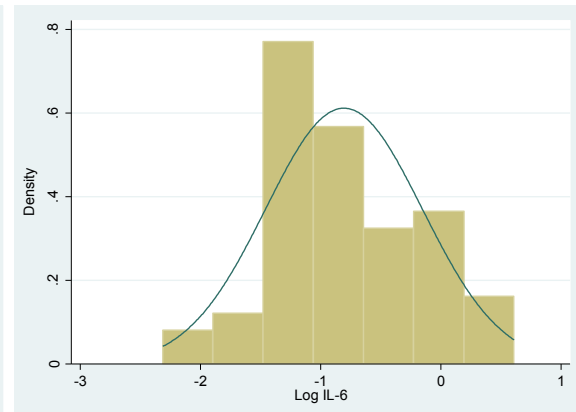

Figure S2. Distributions of log-transformed human variables

Supplement: mmc5.pdf [file mmc5.pdf]

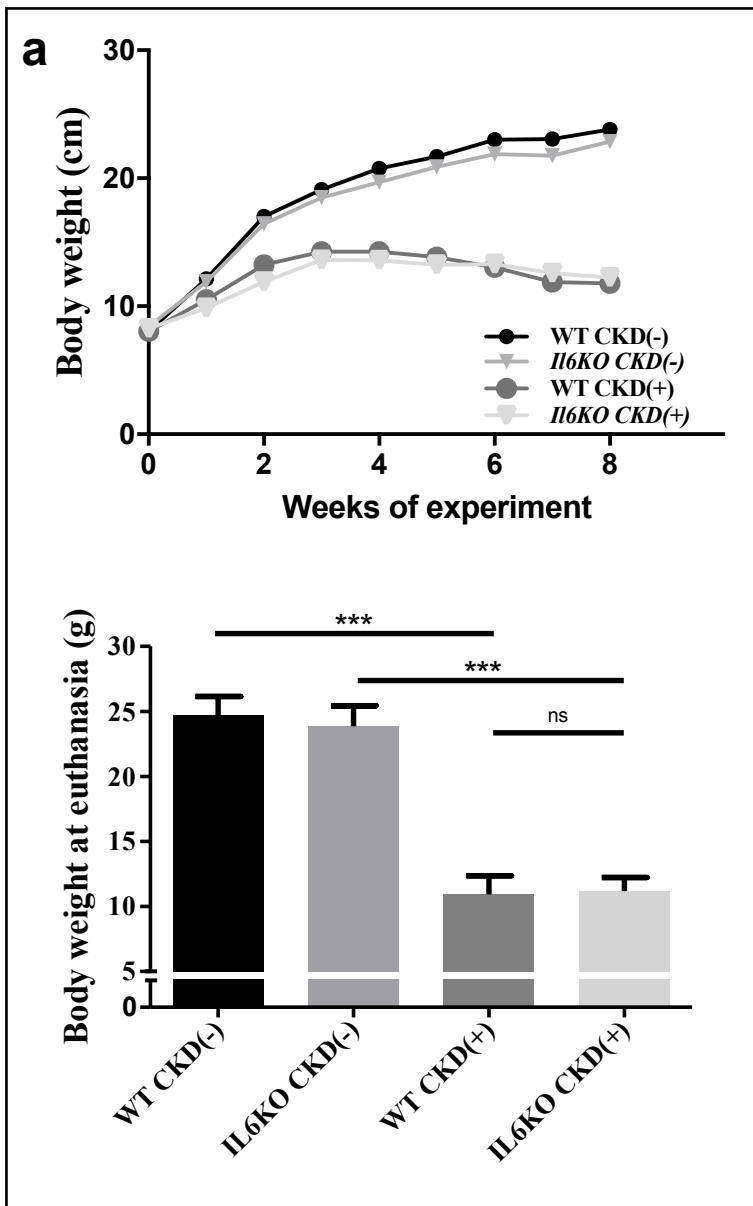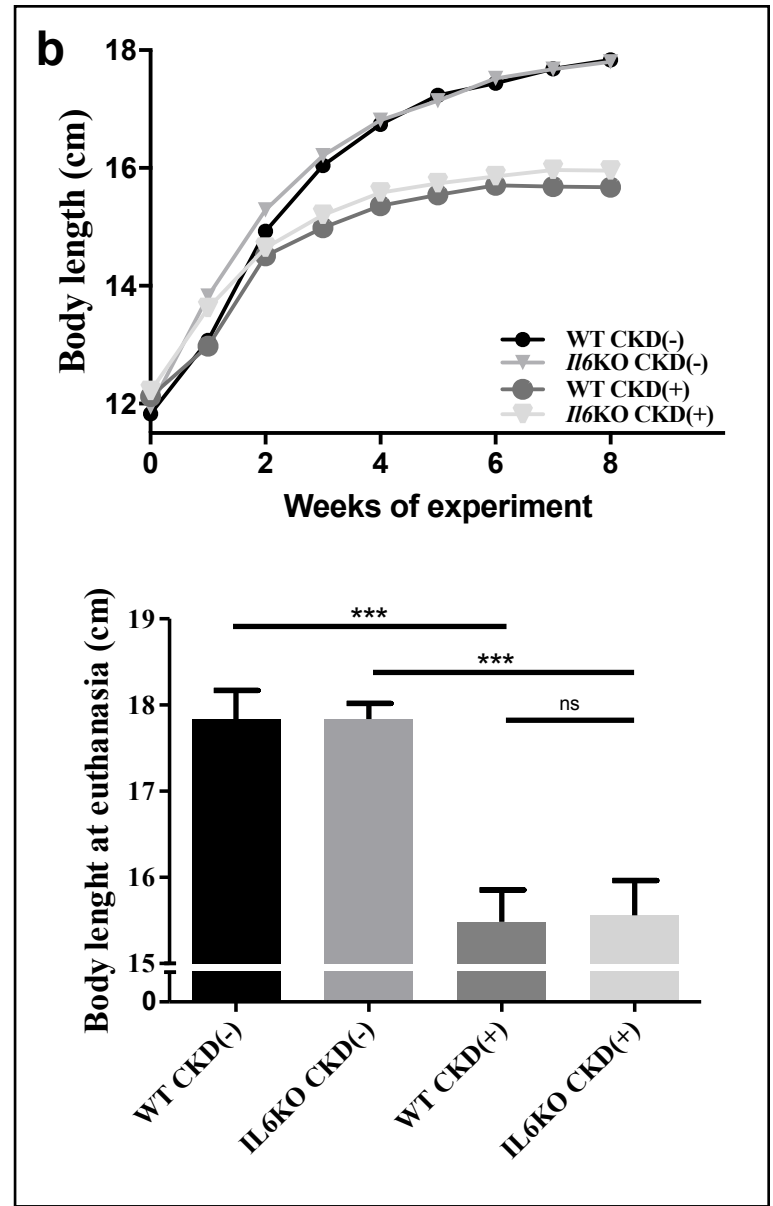

**Figure S4. Body growth in four groups of juvenile mice during the experimental period.**

Supplement: mmc7.pdf [file mmc7.pdf]
